# Supplementary material for: Under what conditions does (SiO)N nucleation occur? A bottom-up kinetic modelling evaluation
Source: Royal Society of Chemistry journal article supplement (doi:10.1039/c6cp03629e), 2016-01-01
Supplement: c6cp03629e2.pdf [file c6cp03629e2.pdf]

## Under what conditions does (SiO)<sub>N</sub> nucleation occur? A bottom-up kinetic modelling evaluation

Stefan T. Bromley\*<sup>1,2</sup>

<sup>1</sup>*Departament de Química Física & Institut de Química Teòrica i Computacional (IQTCUB),  
Universitat de Barcelona, C/ Martí i Franquès 1, E-08028 Barcelona, Spain*

<sup>2</sup>*Institució Catalana de Recerca i Estudis Avançats (ICREA), 08010 Barcelona, Spain*

Juan Carlos Gomez Martin<sup>3</sup>, John M. C. Plane\*<sup>3</sup>

<sup>3</sup>*School of Chemistry, University of Leeds, Leeds, LS2 9JT, UK*

\* Corresponding authors: [s.bromley@ub.edu](mailto:s.bromley@ub.edu), [J.M.C.Plane@leeds.ac.uk](mailto:J.M.C.Plane@leeds.ac.uk)

### Supplementary Information 2

**Table S2.** Rotational constants and vibrational frequencies of the (SiO)<sub>N</sub> clusters for N = 1-20.

| <i>N</i> | Rotational constants / GHz | Vibrational frequencies / cm <sup>-1</sup>                                                                                     |
|----------|----------------------------|--------------------------------------------------------------------------------------------------------------------------------|
| 1        | 21.627                     | 1246                                                                                                                           |
| 2        | 11.464 5.893 3.892         | 232 530 555 752 791 833                                                                                                        |
| 3        | 2.635 2.635 1.317          | 94 94 208 304 304 522 573<br>611 611 723 945 945                                                                               |
| 4        | 1.339 1.157 0.689          | 48 60 66 86 100 102 272<br>296 378 409 532 541 565 589<br>763 951 986 999                                                      |
| 5        | 1.428 0.431 0.418          | 39 52 66 141 148 175 177<br>271 287 312 336 397 430 542<br>589 605 637 665 711 794 799<br>928 966 972                          |
| 6        | 0.837 0.315 0.303          | 17 36 48 70 77 98 106<br>135 156 177 233 273 289 311<br>353 402 411 531 538 554 587<br>623 657 673 790 831 938 967<br>987 1000 |

|    |                   |                                                                    |                                                                    |                                                                    |                                                             |                                                             |                                                              |                                                              |
|----|-------------------|--------------------------------------------------------------------|--------------------------------------------------------------------|--------------------------------------------------------------------|-------------------------------------------------------------|-------------------------------------------------------------|--------------------------------------------------------------|--------------------------------------------------------------|
| 7  | 0.466 0.466 0.279 | 93<br>214<br>332<br>520<br>705<br>979                              | 93<br>254<br>332<br>520<br>715                                     | 93<br>254<br>341<br>662<br>843                                     | 167<br>259<br>410<br>666<br>857                             | 190<br>263<br>412<br>666<br>857                             | 190<br>270<br>412<br>687<br>974                              | 214<br>270<br>479<br>705<br>974                              |
| 8  | 0.351 0.335 0.268 | 57<br>189<br>267<br>402<br>641<br>817                              | 84<br>222<br>309<br>408<br>658<br>876                              | 88<br>235<br>317<br>437<br>668<br>897                              | 90<br>238<br>323<br>450<br>670<br>941                       | 123<br>242<br>342<br>558<br>693<br>968                      | 151<br>254<br>350<br>583<br>698<br>1001                      | 173<br>263<br>369<br>627<br>787<br>1020                      |
| 9  | 0.290 0.227 0.216 | 67<br>173<br>253<br>343<br>515<br>696<br>903                       | 73<br>177<br>261<br>357<br>521<br>725<br>974                       | 81<br>195<br>277<br>368<br>608<br>728<br>977                       | 81<br>197<br>296<br>390<br>621<br>797<br>1007               | 113<br>210<br>306<br>416<br>630<br>866<br>1020              | 116<br>225<br>329<br>425<br>652<br>890<br>1027               | 145<br>237<br>329<br>463<br>684<br>897                       |
| 10 | 0.231 0.177 0.134 | 28<br>145<br>239<br>329<br>478<br>625<br>767<br>978                | 49<br>148<br>260<br>332<br>493<br>658<br>849<br>987                | 57<br>158<br>273<br>333<br>496<br>675<br>850<br>997                | 76<br>182<br>289<br>351<br>552<br>691<br>869<br>1008        | 96<br>186<br>290<br>360<br>558<br>701<br>878<br>1024        | 105<br>203<br>298<br>376<br>582<br>741<br>896                | 106<br>230<br>315<br>391<br>618<br>751<br>921                |
| 11 | 0.242 0.099 0.090 | 23<br>133<br>217<br>295<br>373<br>524<br>688<br>848<br>984         | 45<br>149<br>222<br>311<br>386<br>531<br>703<br>864<br>1004        | 53<br>150<br>224<br>323<br>395<br>567<br>734<br>886<br>1007        | 68<br>154<br>254<br>336<br>436<br>622<br>736<br>892<br>1031 | 88<br>187<br>268<br>348<br>438<br>632<br>763<br>924         | 88<br>201<br>287<br>355<br>470<br>669<br>782<br>953          | 114<br>202<br>289<br>363<br>504<br>681<br>837<br>975         |
| 12 | 0.199 0.101 0.087 | 24<br>126<br>205<br>280<br>332<br>421<br>601<br>741<br>901<br>1032 | 40<br>137<br>220<br>284<br>339<br>447<br>625<br>769<br>942<br>1049 | 72<br>145<br>224<br>293<br>364<br>455<br>628<br>787<br>959<br>1072 | 85<br>159<br>235<br>293<br>366<br>491<br>665<br>792<br>996  | 92<br>167<br>245<br>295<br>377<br>494<br>689<br>855<br>1000 | 102<br>179<br>266<br>323<br>387<br>526<br>709<br>877<br>1016 | 122<br>203<br>274<br>328<br>402<br>559<br>717<br>897<br>1028 |
| 13 | 0.157 0.082 0.077 | 20<br>101<br>148<br>251                                            | 23<br>117<br>167<br>262                                            | 41<br>120<br>172<br>262                                            | 45<br>128<br>196<br>273                                     | 71<br>135<br>209<br>277                                     | 88<br>137<br>220<br>281                                      | 101<br>148<br>233<br>286                                     |

|    |                   |      |      |      |      |      |      |      |
|----|-------------------|------|------|------|------|------|------|------|
|    |                   | 292  | 298  | 314  | 324  | 330  | 350  | 357  |
|    |                   | 369  | 372  | 381  | 407  | 415  | 425  | 447  |
|    |                   | 470  | 484  | 494  | 530  | 569  | 589  | 611  |
|    |                   | 611  | 649  | 691  | 700  | 721  | 738  | 755  |
|    |                   | 783  | 793  | 835  | 884  | 898  | 910  | 960  |
|    |                   | 979  | 1007 | 1018 | 1031 | 1039 | 1056 | 1064 |
|    |                   | 1068 | 1101 |      |      |      |      |      |
| 14 | 0.193 0.051 0.047 | 14   | 15   | 32   | 68   | 74   | 85   | 95   |
|    |                   | 107  | 110  | 125  | 125  | 128  | 168  | 194  |
|    |                   | 195  | 197  | 208  | 212  | 224  | 233  | 235  |
|    |                   | 249  | 250  | 267  | 267  | 279  | 287  | 292  |
|    |                   | 293  | 309  | 313  | 321  | 332  | 335  | 339  |
|    |                   | 343  | 352  | 362  | 381  | 383  | 392  | 408  |
|    |                   | 412  | 423  | 444  | 466  | 498  | 523  | 527  |
|    |                   | 575  | 610  | 623  | 628  | 651  | 663  | 689  |
|    |                   | 706  | 724  | 759  | 761  | 770  | 806  | 809  |
|    |                   | 869  | 873  | 892  | 894  | 923  | 928  | 956  |
|    |                   | 979  | 991  | 1001 | 1006 | 1028 | 1047 | 1051 |
|    |                   | 1074 |      |      |      |      |      |      |
| 15 | 0.133 0.053 0.051 | 13   | 28   | 29   | 33   | 52   | 66   | 72   |
|    |                   | 96   | 98   | 101  | 110  | 115  | 128  | 144  |
|    |                   | 144  | 149  | 156  | 161  | 174  | 178  | 186  |
|    |                   | 202  | 207  | 231  | 254  | 268  | 273  | 278  |
|    |                   | 284  | 303  | 311  | 313  | 316  | 320  | 329  |
|    |                   | 336  | 337  | 343  | 347  | 361  | 363  | 372  |
|    |                   | 379  | 380  | 410  | 418  | 430  | 432  | 436  |
|    |                   | 488  | 499  | 528  | 535  | 566  | 584  | 600  |
|    |                   | 609  | 628  | 655  | 674  | 715  | 722  | 735  |
|    |                   | 741  | 760  | 781  | 801  | 815  | 825  | 854  |
|    |                   | 888  | 900  | 936  | 947  | 971  | 982  | 1002 |
|    |                   | 1003 | 1008 | 1035 | 1036 | 1051 | 1076 | 1082 |
| 16 | 0.100 0.075 0.062 | 14   | 47   | 70   | 73   | 82   | 88   | 92   |
|    |                   | 109  | 114  | 122  | 140  | 148  | 151  | 153  |
|    |                   | 164  | 170  | 180  | 195  | 198  | 202  | 206  |
|    |                   | 207  | 225  | 245  | 253  | 255  | 265  | 270  |
|    |                   | 273  | 277  | 287  | 291  | 305  | 321  | 323  |
|    |                   | 324  | 328  | 332  | 344  | 345  | 358  | 362  |
|    |                   | 370  | 372  | 377  | 385  | 400  | 405  | 409  |
|    |                   | 414  | 418  | 431  | 446  | 459  | 500  | 519  |
|    |                   | 539  | 559  | 621  | 628  | 641  | 658  | 674  |
|    |                   | 677  | 696  | 713  | 722  | 737  | 755  | 791  |
|    |                   | 803  | 808  | 854  | 869  | 871  | 885  | 889  |
|    |                   | 915  | 919  | 935  | 957  | 979  | 983  | 1014 |
|    |                   | 1015 | 1026 | 1028 | 1046 | 1056 | 1069 |      |
| 17 | 0.080 0.067 0.051 | 2    | 28   | 42   | 43   | 51   | 63   | 72   |
|    |                   | 74   | 89   | 93   | 104  | 110  | 115  | 138  |
|    |                   | 145  | 148  | 152  | 160  | 178  | 192  | 195  |
|    |                   | 197  | 205  | 212  | 216  | 222  | 226  | 245  |
|    |                   | 251  | 254  | 257  | 263  | 271  | 279  | 289  |
|    |                   | 292  | 299  | 302  | 311  | 320  | 324  | 333  |

|    |                   |      |      |      |      |      |      |      |
|----|-------------------|------|------|------|------|------|------|------|
|    |                   | 335  | 340  | 345  | 358  | 364  | 369  | 371  |
|    |                   | 378  | 382  | 389  | 391  | 413  | 415  | 417  |
|    |                   | 445  | 446  | 460  | 510  | 515  | 551  | 605  |
|    |                   | 615  | 624  | 633  | 636  | 676  | 688  | 690  |
|    |                   | 701  | 715  | 740  | 754  | 791  | 802  | 811  |
|    |                   | 816  | 857  | 874  | 877  | 905  | 915  | 920  |
|    |                   | 951  | 969  | 993  | 997  | 1023 | 1026 | 1035 |
|    |                   | 1038 | 1047 | 1078 | 1099 | 1115 |      |      |
| 18 | 0.089 0.047 0.046 | 10   | 15   | 21   | 35   | 51   | 54   | 56   |
|    |                   | 63   | 72   | 73   | 76   | 88   | 90   | 106  |
|    |                   | 115  | 116  | 133  | 137  | 148  | 152  | 176  |
|    |                   | 180  | 188  | 195  | 200  | 208  | 217  | 226  |
|    |                   | 226  | 230  | 233  | 236  | 238  | 249  | 258  |
|    |                   | 260  | 276  | 276  | 287  | 290  | 308  | 317  |
|    |                   | 318  | 324  | 329  | 329  | 334  | 334  | 345  |
|    |                   | 346  | 358  | 360  | 364  | 374  | 386  | 389  |
|    |                   | 395  | 400  | 411  | 416  | 434  | 438  | 444  |
|    |                   | 467  | 500  | 507  | 563  | 576  | 591  | 601  |
|    |                   | 609  | 614  | 640  | 677  | 683  | 686  | 687  |
|    |                   | 716  | 747  | 750  | 760  | 768  | 815  | 827  |
|    |                   | 893  | 897  | 928  | 947  | 953  | 1003 | 1004 |
|    |                   | 1006 | 1011 | 1039 | 1044 | 1063 | 1082 | 1083 |
|    |                   | 1084 | 1089 | 1118 | 1127 |      |      |      |
| 19 | 0.087 0.050 0.050 | 39   | 63   | 68   | 68   | 75   | 75   | 85   |
|    |                   | 86   | 103  | 125  | 129  | 129  | 132  | 132  |
|    |                   | 145  | 157  | 179  | 179  | 187  | 188  | 194  |
|    |                   | 201  | 201  | 219  | 223  | 227  | 227  | 251  |
|    |                   | 251  | 262  | 264  | 264  | 268  | 272  | 273  |
|    |                   | 291  | 291  | 291  | 301  | 314  | 314  | 328  |
|    |                   | 329  | 332  | 332  | 335  | 340  | 340  | 343  |
|    |                   | 346  | 363  | 377  | 377  | 386  | 394  | 397  |
|    |                   | 411  | 411  | 419  | 438  | 438  | 454  | 454  |
|    |                   | 489  | 489  | 490  | 528  | 528  | 563  | 588  |
|    |                   | 588  | 593  | 596  | 596  | 613  | 658  | 658  |
|    |                   | 686  | 708  | 712  | 712  | 731  | 745  | 746  |
|    |                   | 778  | 778  | 788  | 821  | 821  | 844  | 879  |
|    |                   | 906  | 906  | 917  | 931  | 945  | 945  | 962  |
|    |                   | 962  | 1001 | 1001 | 1031 | 1031 | 1031 | 1044 |
|    |                   | 1120 | 1120 | 1168 |      |      |      |      |
| 20 | 0.072 0.047 0.042 | 29   | 34   | 52   | 57   | 63   | 65   | 75   |
|    |                   | 77   | 85   | 95   | 109  | 111  | 117  | 126  |
|    |                   | 129  | 132  | 141  | 142  | 149  | 163  | 176  |
|    |                   | 178  | 185  | 186  | 192  | 197  | 204  | 219  |
|    |                   | 220  | 222  | 242  | 254  | 255  | 264  | 264  |
|    |                   | 265  | 268  | 269  | 274  | 283  | 285  | 293  |
|    |                   | 298  | 309  | 315  | 325  | 329  | 330  | 334  |
|    |                   | 335  | 337  | 342  | 342  | 350  | 361  | 372  |
|    |                   | 373  | 378  | 386  | 390  | 412  | 415  | 416  |
|    |                   | 419  | 422  | 442  | 454  | 454  | 488  | 491  |
|    |                   | 491  | 528  | 535  | 563  | 567  | 589  | 590  |

|  |  |      |      |      |      |      |      |      |
|--|--|------|------|------|------|------|------|------|
|  |  | 598  | 605  | 610  | 634  | 662  | 682  | 706  |
|  |  | 715  | 721  | 735  | 742  | 745  | 776  | 786  |
|  |  | 792  | 805  | 818  | 839  | 890  | 909  | 922  |
|  |  | 928  | 931  | 954  | 962  | 984  | 985  | 1012 |
|  |  | 1021 | 1036 | 1039 | 1048 | 1054 | 1073 | 1097 |
|  |  | 1123 | 1170 |      |      |      |      |      |
